# Supplementary material for: The Akt signaling pathway is required for tissue maintenance and regeneration in planarians
Source: PubMed Central journal article supplement (PMC4827215; doi:10.1186/s12861-016-0107-z), 2016-04-11

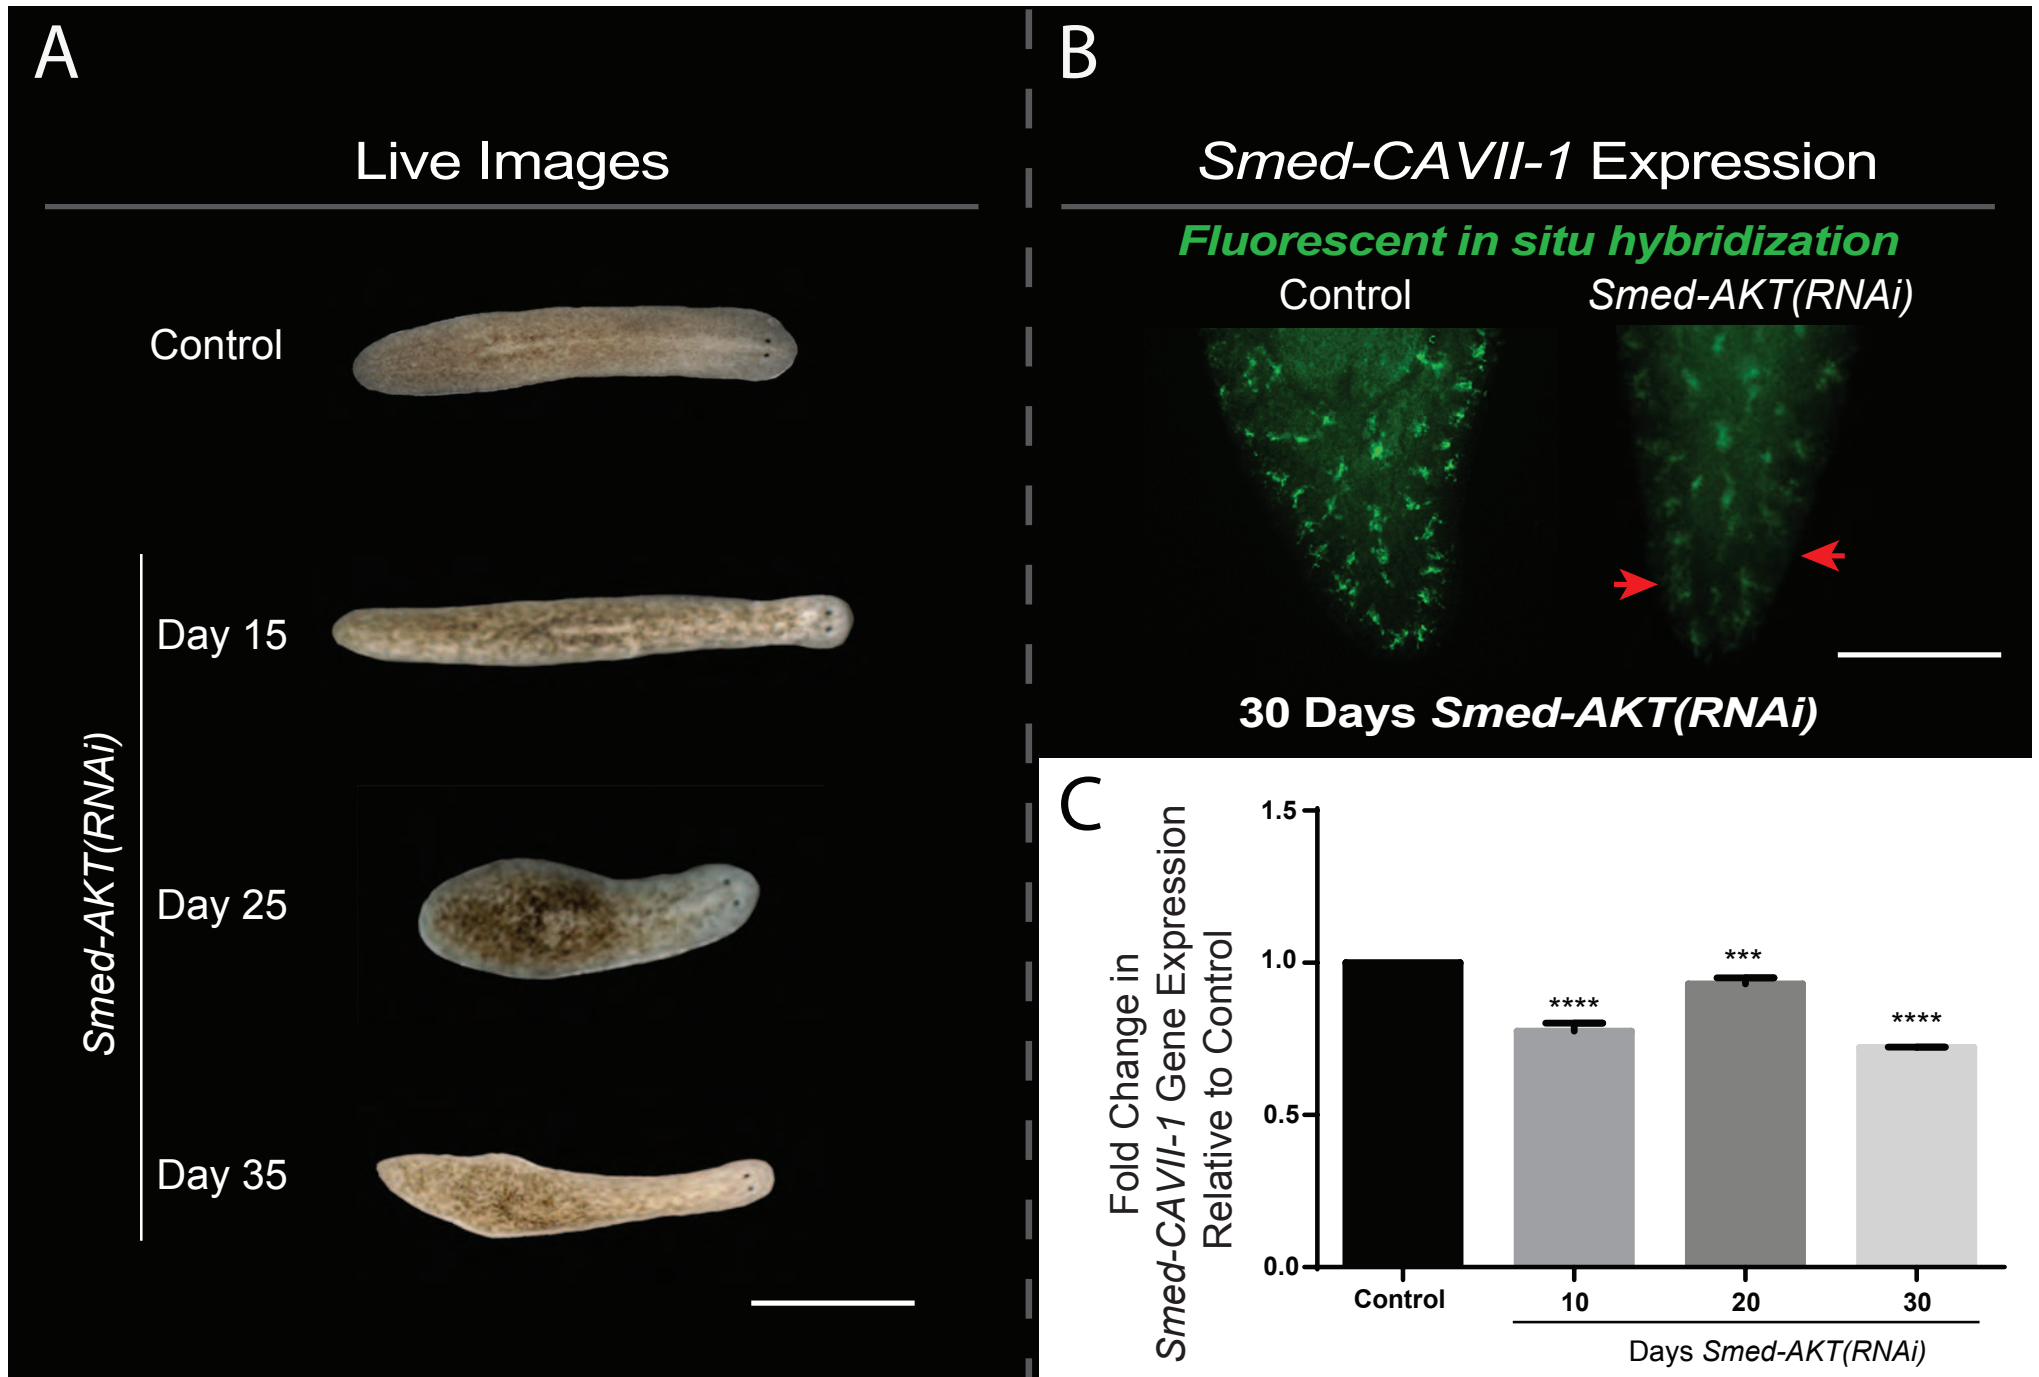

Supplement: 12861_2016_107_MOESM3_ESM.pdf [file 12861_2016_107_MOESM3_ESM.pdf]
