# Supplementary material for: The Akt signaling pathway is required for tissue maintenance and regeneration in planarians
Source: PubMed Central journal article supplement (PMC4827215; doi:10.1186/s12861-016-0107-z), 2016-04-11
Supplement: 12861_2016_107_MOESM4_ESM.pdf [file 12861_2016_107_MOESM4_ESM.pdf]

### Smed-PC2 Expression

Fluorescent in situ hybridization

Control Smed-AKT(RNAi)

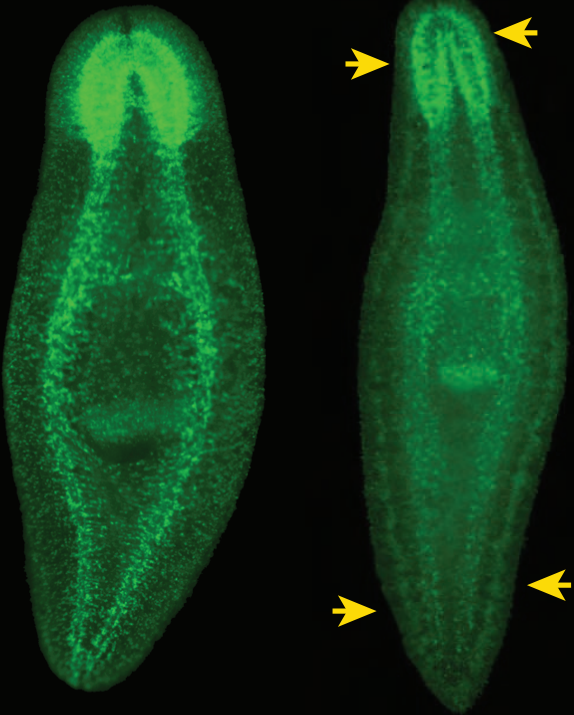

Expression Intensity

Control Smed-AKT(RNAi)

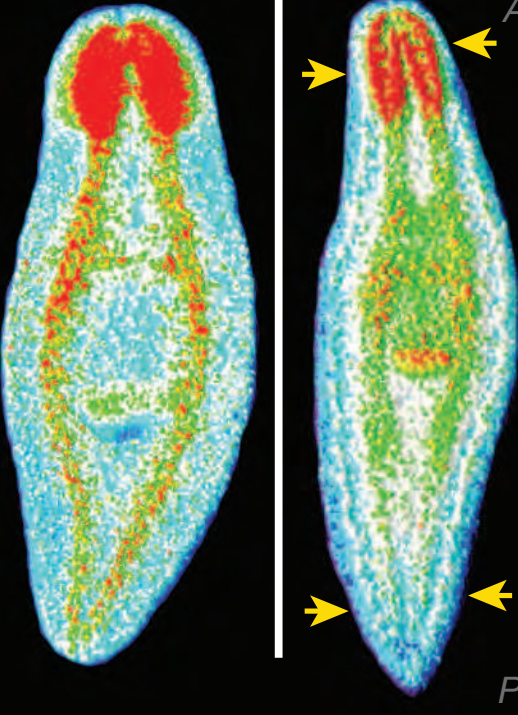

Low High

Anterior Posterior

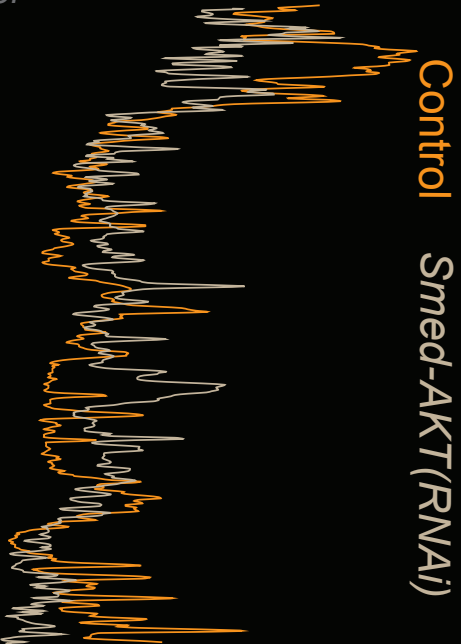

30 Days after first injection
